# Supplementary material for: Superlubrication properties of ultra-nanocrystalline diamond film sliding against a zirconia ball
Source: Royal Society of Chemistry journal article supplement (doi:10.1039/c5ra18832f), 2015-01-01
Supplement: c5ra18832f1.pdf [file c5ra18832f1.pdf]

# Supporting Information

## Superlubrication properties of ultra-nanocrystalline diamond film sliding against the zirconia ball

Revati Rani<sup>a</sup>, N. Kumar<sup>a\*</sup>, A.T. Kozakov<sup>b</sup>, K.A. Googlev<sup>b</sup>, K.J. Sankaran<sup>c</sup>, Pankaj Kr. Das<sup>d</sup>,  
S. Dash<sup>a</sup>, A.K. Tyagi<sup>a</sup>, I-Nan Lin<sup>c</sup>

<sup>a</sup>Materials Science Group, Indira Gandhi Centre for Atomic Research, Kalpakkam, India

<sup>b</sup>Research Institute of Physics, Southern Federal University, Rostov-on-Don, Russian Federation

<sup>c</sup>Department of Physics, Tamkang University, Tamsui, Taiwan

<sup>d</sup>Department of Mechanical Engineering, National Institute of Technology, Agartala, India

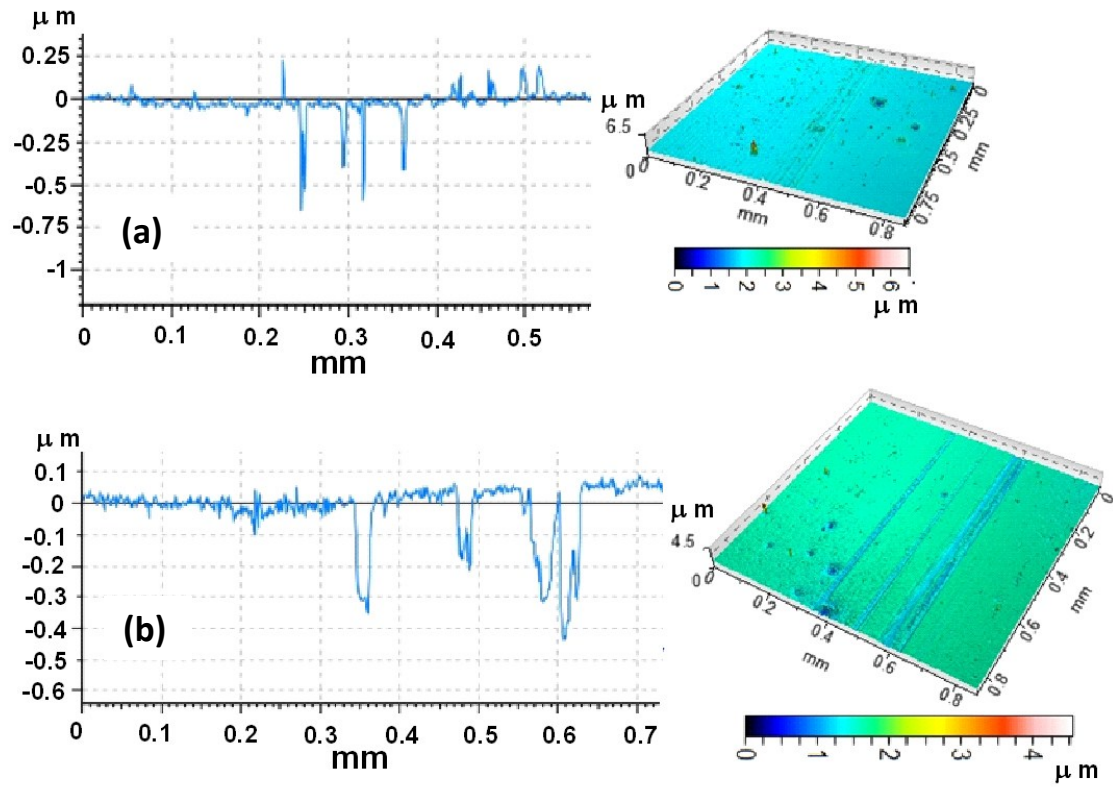

**Figure SI-1.** 3D images obtained from the wear track of UNCD(Ar) film formed at (a) 2 N (b) 6 N loads

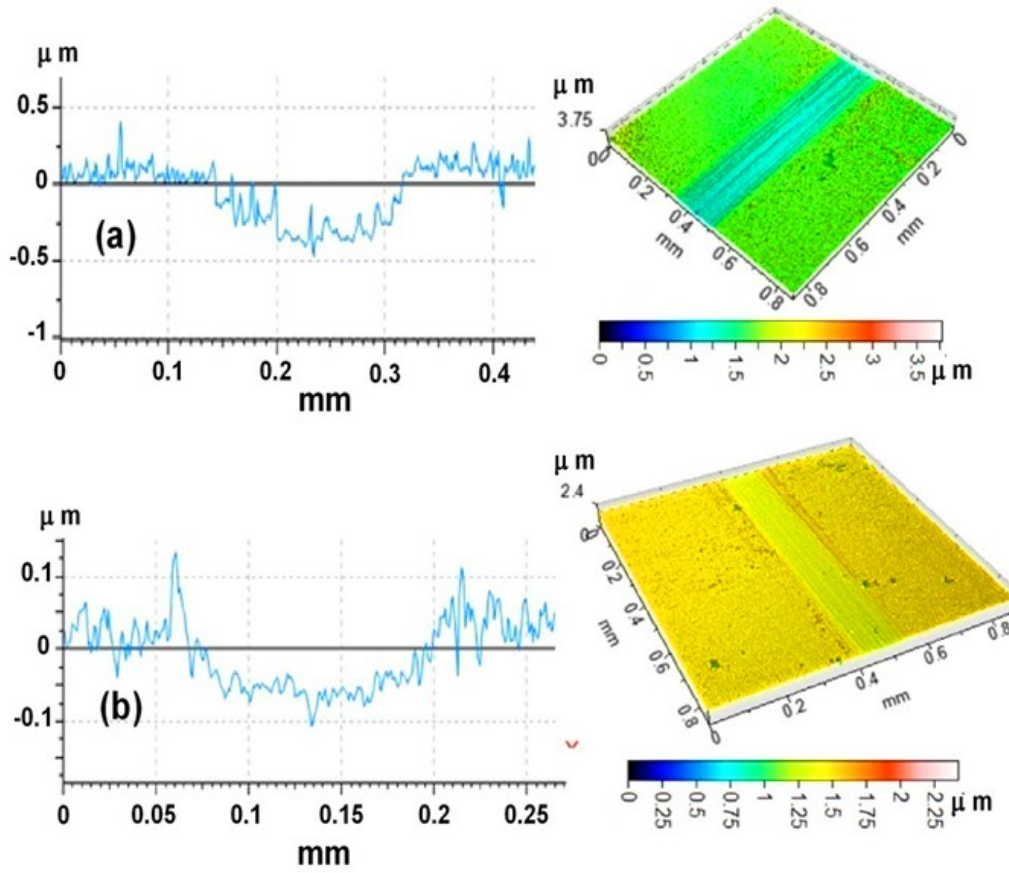

**Figure SI-2.** 3D images obtained from the wear track of UNCD(N) film formed at (a) 2 N (b) 6 N loads

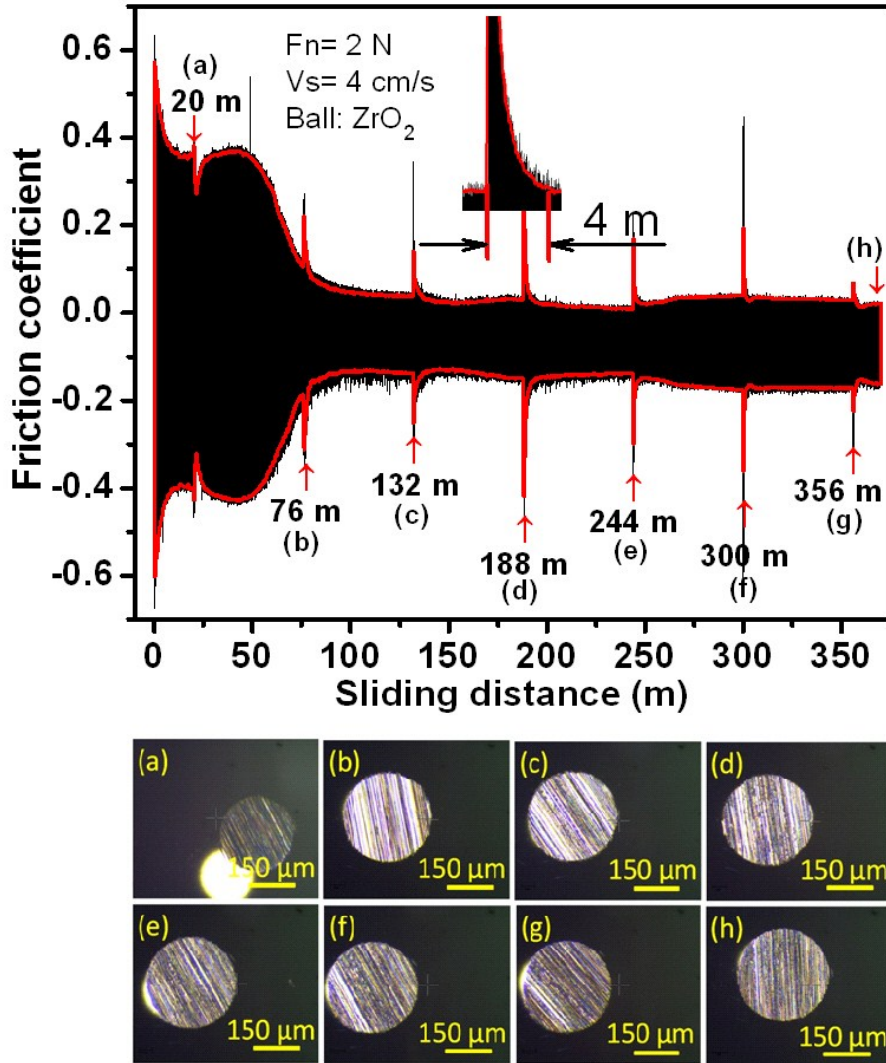

**Figure SI-3.** Friction coefficient and scar on  $\text{ZrO}_2$  ball sliding against UNCD(Ar) film while pausing the test periodically for approximately 2 minutes without changing the contact position of ball

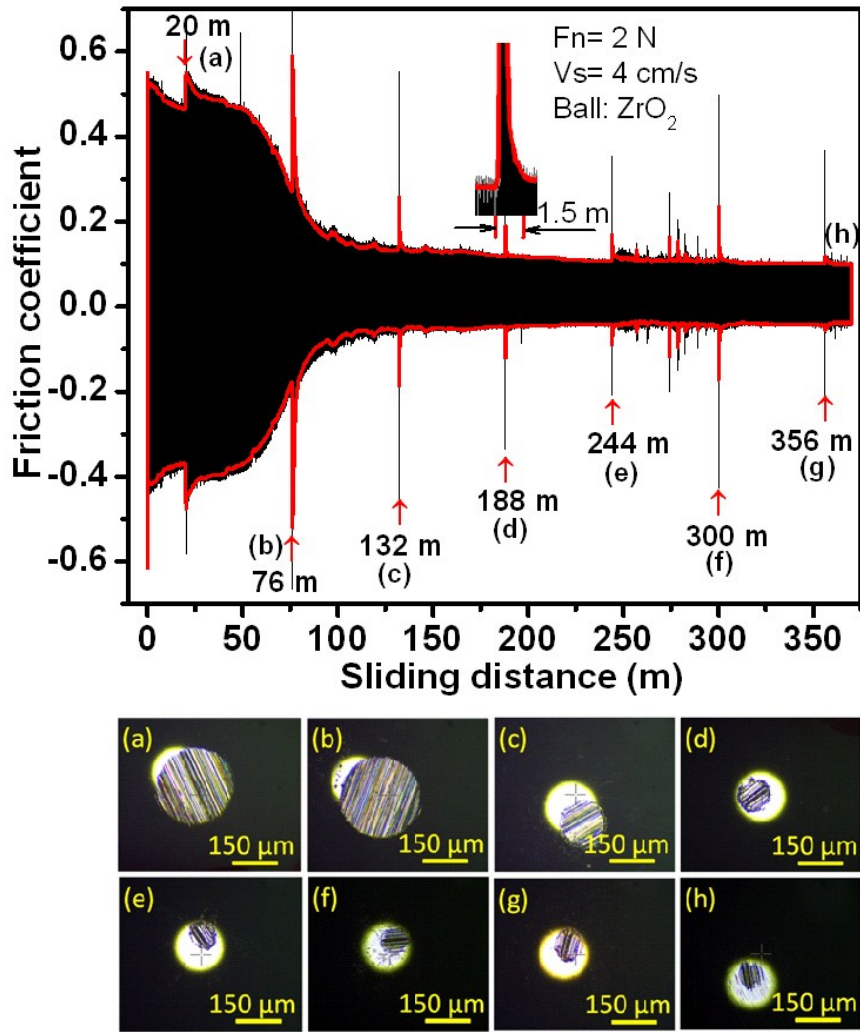

**Figure SI-4.** Friction coefficient and wear scar on  $\text{ZrO}_2$  ball sliding against UNCD(Ar) film while periodically fixing the new ball contact position

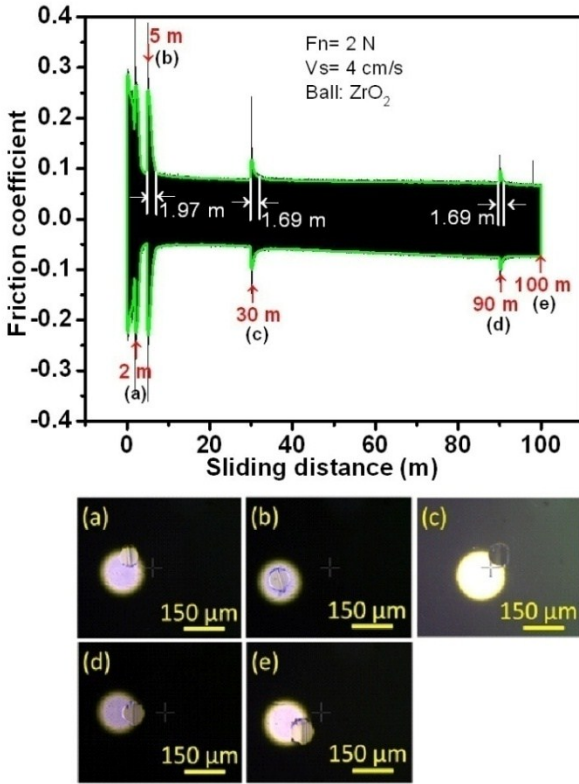

**Figure SI-5.** Friction coefficient and scar on  $\text{ZrO}_2$  ball sliding against UNCD(N) film while pausing the test periodically for approximately 2 minutes without changing the contact position of ball

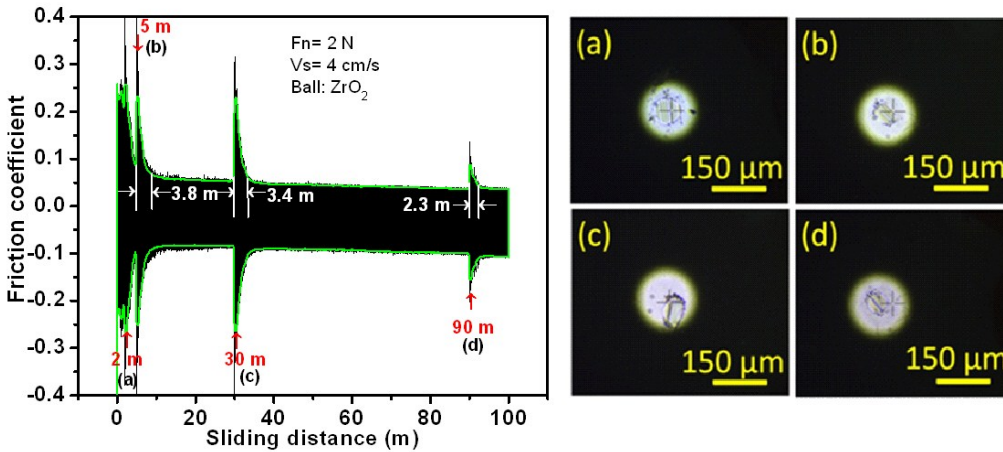

**Figure SI-6.** Friction coefficient and wear scar on  $\text{ZrO}_2$  ball sliding against UNCD(N) film while periodically fixing the new ball contact position
